# Supplementary material for: Use of Social Media in Health Communication: Findings From the Health Information National Trends Survey 2013, 2014, and 2017
Source: PubMed Central journal article supplement — Cancer Control. 2019 Apr 18;26(1):1073274819841442. doi: 10.1177/1073274819841442 (PMC6475857; doi:10.1177/1073274819841442), 2019-04-18
Supplement: Supplementary_Files.pdf [file Supplementary_Files.pdf]

**Supplemental Table 1: Study Sample Selection Criteria**

| <b>Step</b> | <b>Selection Criteria</b>                                   | <b>Health Information Share</b> |          | <b>Medical Information Exchange</b> |          |
|-------------|-------------------------------------------------------------|---------------------------------|----------|-------------------------------------|----------|
|             |                                                             | Included                        | Excluded | Included                            | Excluded |
| 0           | Total sample size                                           | 6470                            |          | 6862                                |          |
| 1           | If answer on social media use is missing                    | 5507                            | 963      | 6640                                | 222      |
| 2           | Excluded if age is missing                                  | 5320                            | 187      | 6379                                | 261      |
| 3           | Excluded if sex is missing                                  | 5047                            | 273      | 6017                                | 362      |
| 4           | Excluded if race is missing                                 | 4733                            | 314      | 5544                                | 473      |
| 5           | Excluded if education is missing                            | 4716                            | 17       | 5520                                | 24       |
| 6           | Excluded if marital status is missing                       | 4689                            | 27       | 5472                                | 48       |
| 7           | Excluded if income is missing                               | 4402                            | 287      | 5078                                | 394      |
| 8           | Excluded if employment is missing                           | 4396                            | 6        | 5069                                | 9        |
| 9           | Excluded if region is missing                               | 4396                            | 0        | 5069                                | 0        |
| 10          | Excluded if health insurance is missing                     | 4363                            | 33       | 5040                                | 29       |
| 11          | Excluded if general health status is missing                | 4312                            | 51       | 4931                                | 109      |
| 12          | Excluded if smoking status is missing                       | 4293                            | 19       | 4902                                | 29       |
| 13          | Excluded if answer on 'ever had cancer' is missing          | 4285                            | 8        | 4895                                | 7        |
| 14          | Excluded if answer on 'family every had cancer ' is missing | 4242                            | 43       | 4834                                | 61       |
| 15          | Final Dataset<br>(weighted sample size)                     | 4242<br>(343,465,241)           |          | 4834<br>(354,419,489)               |          |

**Supplemental Table 2. Predictors of use of social media in health communication using logistic regression, reduced models**

| Characteristics                     | Health Information Share |        |         | Medical Information Exchange |        |         |      |      |
|-------------------------------------|--------------------------|--------|---------|------------------------------|--------|---------|------|------|
|                                     | OR                       | 95% CI | P-value | OR                           | 95% CI | P-value |      |      |
| <b>Year</b>                         |                          |        |         |                              |        |         |      |      |
| 2013                                | 1.00                     |        |         | 1.00                         |        |         |      |      |
| 2014                                | -                        | -      | -       | 1.90                         | 1.09   | 3.34    | .025 |      |
| 2017                                | 0.64                     | 0.50   | 0.81    | .001                         | -      | -       | -    |      |
| <b>Age Group</b>                    |                          |        |         |                              |        |         |      |      |
| 18-49                               | 1.00                     |        |         | 1.00                         |        |         |      |      |
| 50-64                               | 0.35                     | 0.26   | 0.47    | <.001                        | 0.67   | 0.40    | 1.13 | .128 |
| 65+                                 | 0.15                     | 0.10   | 0.21    | <.001                        | 0.43   | 0.23    | 0.82 | .011 |
| <b>Sex</b>                          |                          |        |         |                              |        |         |      |      |
| Male                                | 1.00                     |        |         | -                            |        |         |      |      |
| Female                              | 2.10                     | 1.47   | 3.01    | <.001                        | -      |         |      |      |
| <b>Diagnosed with cancer</b>        |                          |        |         |                              |        |         |      |      |
| No                                  | 1.00                     |        |         | -                            |        |         |      |      |
| Yes                                 | 1.56                     | 1.03   | 2.36    | .037                         | -      |         |      |      |
| <b>Family history of any cancer</b> |                          |        |         |                              |        |         |      |      |
| No                                  | 1.00                     |        |         | -                            |        |         |      |      |
| Yes                                 | 1.60                     | 1.17   | 2.18    | .004                         |        |         |      |      |
| Not sure                            | 0.73                     | 0.42   | 1.27    | .262                         | -      |         |      |      |
